# Supplementary material
Source: publisher site journal article supplement (https://www.dovepress.com/article/350837)
Supplement: Supplementary file 1 [file get_supplementary_file.php]

Supplementary materials

Table S1. Endoscopic Characteristics of Enrolled Patients

|  | CCAD | ENP | NENP | CCAD vs ENP  *P value* | CCAD vs NENP  *P value* | ENP vs NENP  *P value* |
| --- | --- | --- | --- | --- | --- | --- |
| Total | 5.50 (2.00, 6.50) | 7.00 (6.00, 10.00) | 8.00 (5.00, 10.00) | 0.016 | 0.018 | 0.682 |
| Polyps | 1.50 (1.00, 2.25) | 3.00 (2.00, 4.00) | 3.00 (2.00, 4.00) | 0.014 | 0.008 | 0.563 |
| Edema | 2.00 (1.00, 3.25) | 2.00 (2.00, 4.00) | 3.00 (2.00, 4.00) | 0.073 | 0.054 | 0.619 |
| Discharge | 2.00 (0.75, 2.25) | 2.00 (2.00, 3.00) | 3.00 (2.00, 3.00) | 0.033 | 0.011 | 0.335 |

CCAD, central compartment atopic disease; ENP, eosinophilic chronic rhinosinusitis with nasal polyps; NENP, non-eosinophilic chronic rhinosinusitis with nasal polyps.

Table S2. CT Lund-Mackay Score of Enrolled Patients

|  | CCAD | ENP | NENP | CCAD vs ENP  *P value* | CCAD vs NENP  *P value* | ENP vs NENP  *P value* |
| --- | --- | --- | --- | --- | --- | --- |
| Total | 8.00 (4.25, 10.00) | 11.00 (9.00, 18.50) | 13.50 (8.00, 18.25) | < 0.001 | 0.008 | 0.588 |
| Frontal sinus | 1.50 (0.00, 2.00) | 2.00 (2.00, 3.00) | 2.50 (1.75, 4.00) | 0.002 | 0.014 | 0.782 |
| Maxillary sinus | 2.00 (1.75, 2.00) | 2.00 (2.00, 3.00) | 2.50 (2.00, 4.00) | 0.003 | 0.001 | 0.110 |
| Anterior ethmoid sinus | 2.00 (0.75, 2.00) | 2.00 (2.00, 4.00) | 2.00 (2.00, 3.00) | 0.001 | 0.008 | 0.464 |
| Posterior ethmoid sinus | 2.00 (0.75, 2.00) | 2.00 (2.00, 4.00) | 2.00 (1.00, 3.00) | 0.003 | 0.229 | 0.086 |
| Sphenoid sinus | 1.00 (0.00, 1.25) | 2.00 (1.00, 3.00) | 2.00 (0.00, 2.00) | 0.010 | 0.064 | 0.336 |
| OMC | 0.00 (0.00, 0.00) | 1.00 (0.00, 4.00) | 2.00 (0.00, 4.00) | 0.013 | 0.008 | 0.745 |
| E/M ratio | 2.00 (1.00, 2.00) | 2.00 (2.00, 2.25) | 1.88 (1.00, 2.00) | 0.056 | 0.310 | 0.001 |

CT, computed tomography; CCAD, central compartment atopic disease; ENP, eosinophilic nasal polyps; NENP, non-eosinophilic nasal polyps; OMC, ostiomeatal complex; E/M, ethmoid sinus/maxillary sinus.

Table S3. Aeroallergen Positive Rates of Enrolled Patients

|  | CCAD | ENP | NENP | CCAD vs ENP  *P value* | CCAD vs NENP  *P value* | ENP vs NENP  *P value* |
| --- | --- | --- | --- | --- | --- | --- |
| **Inhaled allergen** | 14 (100.00%) | 13 (40.63%) | 6 (23.08%) | 0.000 | 0.000 | 0.157 |
| *D. pteronyssinus* | 10 (71.43%) | 10 (31.25%) | 4 (15.38%) | 0.011 | 0.001 | 0.160 |
| house dust | 0 (0.00%) | 1 (3.13%) | 1 (3.85%) | 1.000 | 1.000 | 1.000 |
| mulberry | 5 (35.71%) | 0 (0.00%) | 1 (3.85%) | 0.002 | 0.026 | 0.448 |
| cat hair and dander mix | 0 (0.00%) | 1 (3.13%) | 0 (0.00%) | 1.000 | NA | 1.000 |
| dog hair and dander mix | 2 (14.29%) | 1 (3.13%) | 0 (0.00%) | 0.216 | 0.117 | 1.000 |
| cockroach | 5 (35.71%) | 1 (3.13%) | 1 (3.85%) | 0.011 | 0.026 | 1.000 |
| amaranth | 4 (28.57%) | 1 (3.13%) | 1 (3.85%) | 0.042 | 0.079 | 1.000 |
| mold mix | 1 (7.14%) | 1 (3.13%) | 1 (3.85%) | 0.521 | 1.000 | 1.000 |
| grass pollen mix | 4 (28.57%) | 0 (0.00%) | 0 (0.00%) | 0.009 | 0.020 | NA |
| tree pollen mix | 4 (28.57%) | 1 (3.13%) | 1 (3.85%) | 0.042 | 0.079 | 1.000 |

CT, computed tomography; CCAD, central compartment atopic disease; ENP, eosinophilic nasal polyps; NENP, non-eosinophilic nasal polyps.

Table S4. VAS of Enrolled Patients

|  | CCAD | ENP | NENP | CCAD vs ENP  *P value* | CCAD vs NENP  *P value* | ENP vs NENP  *P value* |
| --- | --- | --- | --- | --- | --- | --- |
| Total | 13.50 (7.75, 19.00) | 20.00 (16.25, 22.75) | 16.50 (12.00, 21.00) | < 0.001 | 0.046 | 0.028 |
| Nasal obstruction | 5.50 (4.75, 6.00) | 6.00 (6.00, 6.00) | 6.00 (5.00, 6.25) | 0.090 | 0.685 | 0.173 |
| Olfaction | 2.00 (0.00, 6.00) | 6.00 (3.25, 7.75) | 5.00 (2.50, 6.00) | 0.006 | 0.159 | 0.028 |
| Rhinorrhea | 4.50 (0.00, 6.00) | 6.00 (5.00, 6.00) | 6.00 (4.00, 6.00) | 0.038 | 0.158 | 0.314 |
| Facial pain/headache | 1.00 (0.00, 1.00) | 2.00 (1.00, 3.75) | 1.00 (0.00, 2.25) | 0.007 | 0.087 | 0.173 |
| Overall burden | 6.00 (3.00, 6.25) | 6.00 (6.00, 7.00) | 5.50 (5.00, 6.25) | 0.078 | 0.965 | 0.031 |

VAS, visual analogue scale; CCAD, central compartment atopic disease; ENP, eosinophilic chronic rhinosinusitis with nasal polyps; NENP, non-eosinophilic chronic rhinosinusitis with nasal polyps.

Table S5. Pathologic Characteristics of Enrolled Patients

|  | CCAD | ENP | NENP | CCAD vs ENP  *P value* | CCAD vs NENP  *P value* | ENP vs NENP  *P value* |
| --- | --- | --- | --- | --- | --- | --- |
| Eosinophil (%) | 26.55 (20.01, 40.03) | 47.21 (25.23, 62.95) | 1.84 (0.64, 4.50) | 0.045 | < 0.001 | < 0.001 |
| Neutrophil (%) | 0.49 (0.00, 6.75) | 0.35 (0.08, 1.53) | 1.72 (0.40, 4.82) | 0.943 | 0.220 | 0.017 |
| Lymphocyte (%) | 60.85 (45.31, 66.80) | 40.40 (25.34, 62.63) | 81.23 (72.45, 86.15) | 0.090 | 0.005 | < 0.001 |
| Plasma cell (%) | 7.33 (4.81, 11.32) | 4.71 (3.41, 10.49) | 14.31 (8.78, 19.59) | 0.390 | 0.005 | < 0.001 |

CCAD, central compartment atopic disease; ENP, eosinophilic chronic rhinosinusitis with nasal polyps; NENP, non-eosinophilic chronic rhinosinusitis with nasal polyps.

Table S6. Blood cell Counts and Percentages of Enrolled Patients

|  | CCAD | ENP | NENP | CCAD vs ENP  *P value* | CCAD vs NENP  *P value* | ENP vs NENP  *P value* |
| --- | --- | --- | --- | --- | --- | --- |
| **Count (×10^9/L)** |  |  |  |  |  |  |
| White blood cells | 6.46 (5.15, 6.92) | 7.12 (6.08, 8.23) | 6.77 (5.81, 8.03) | 0.064 | 0.192 | 0.662 |
| Neutrophil | 2.95 (2.77, 3.81) | 3.65 (2.77, 4.75) | 3.58 (2.98, 4.74) | 0.189 | 0.169 | 0.907 |
| Lymphocyte | 1.95 (1.73, 2.81) | 2.07 (1.69, 2.43) | 2.10 (1.81, 2.56) | 0.738 | 0.681 | 0.584 |
| Eosinophil | 0.26 (0.18, 0.35) | 0.40 (0.25, 0.64) | 0.15 (0.10, 0.29) | 0.041 | 0.119 | 0.002 |
| **Percentage (%)** |  |  |  |  |  |  |
| Neutrophil | 54.43 (44.68, 59.85) | 49.66 (47.21, 59.88) | 55.44 (48.71, 62.11) | 0.793 | 0.777 | 0.390 |
| Lymphocyte | 33.18 (27.39, 42.21) | 31.81 (28.53, 37.03) | 32.81 (25.70, 40.44) | 0.431 | 0.444 | 0.399 |
| Eosinophil | 4.22 (3.03, 5.79) | 6.83 (3.52, 9.46) | 2.10 (1.47, 4.53) | 0.066 | 0.047 | 0.001 |

CCAD, central compartment atopic disease; ENP, eosinophilic chronic rhinosinusitis with nasal polyps; NENP, non-eosinophilic chronic rhinosinusitis with nasal polyps.
